# Supplementary material for: Comparative Pre-clinical Efficacy of Chinese and Indian Cultivars of Bitter Melon (Momordica charantia) against Pancreatic Cancer
Source: PubMed Central journal article supplement — J Cancer Prev. 2021 Dec 30;26(4):266–76. doi: 10.15430/JCP.2021.26.4.266 (PMC8749318; doi:10.15430/jcp.2021.26.4.266), 2021-12-30
Supplement: jcp-26-4-266-supple.pdf [file jcp-26-4-266-supple.pdf]

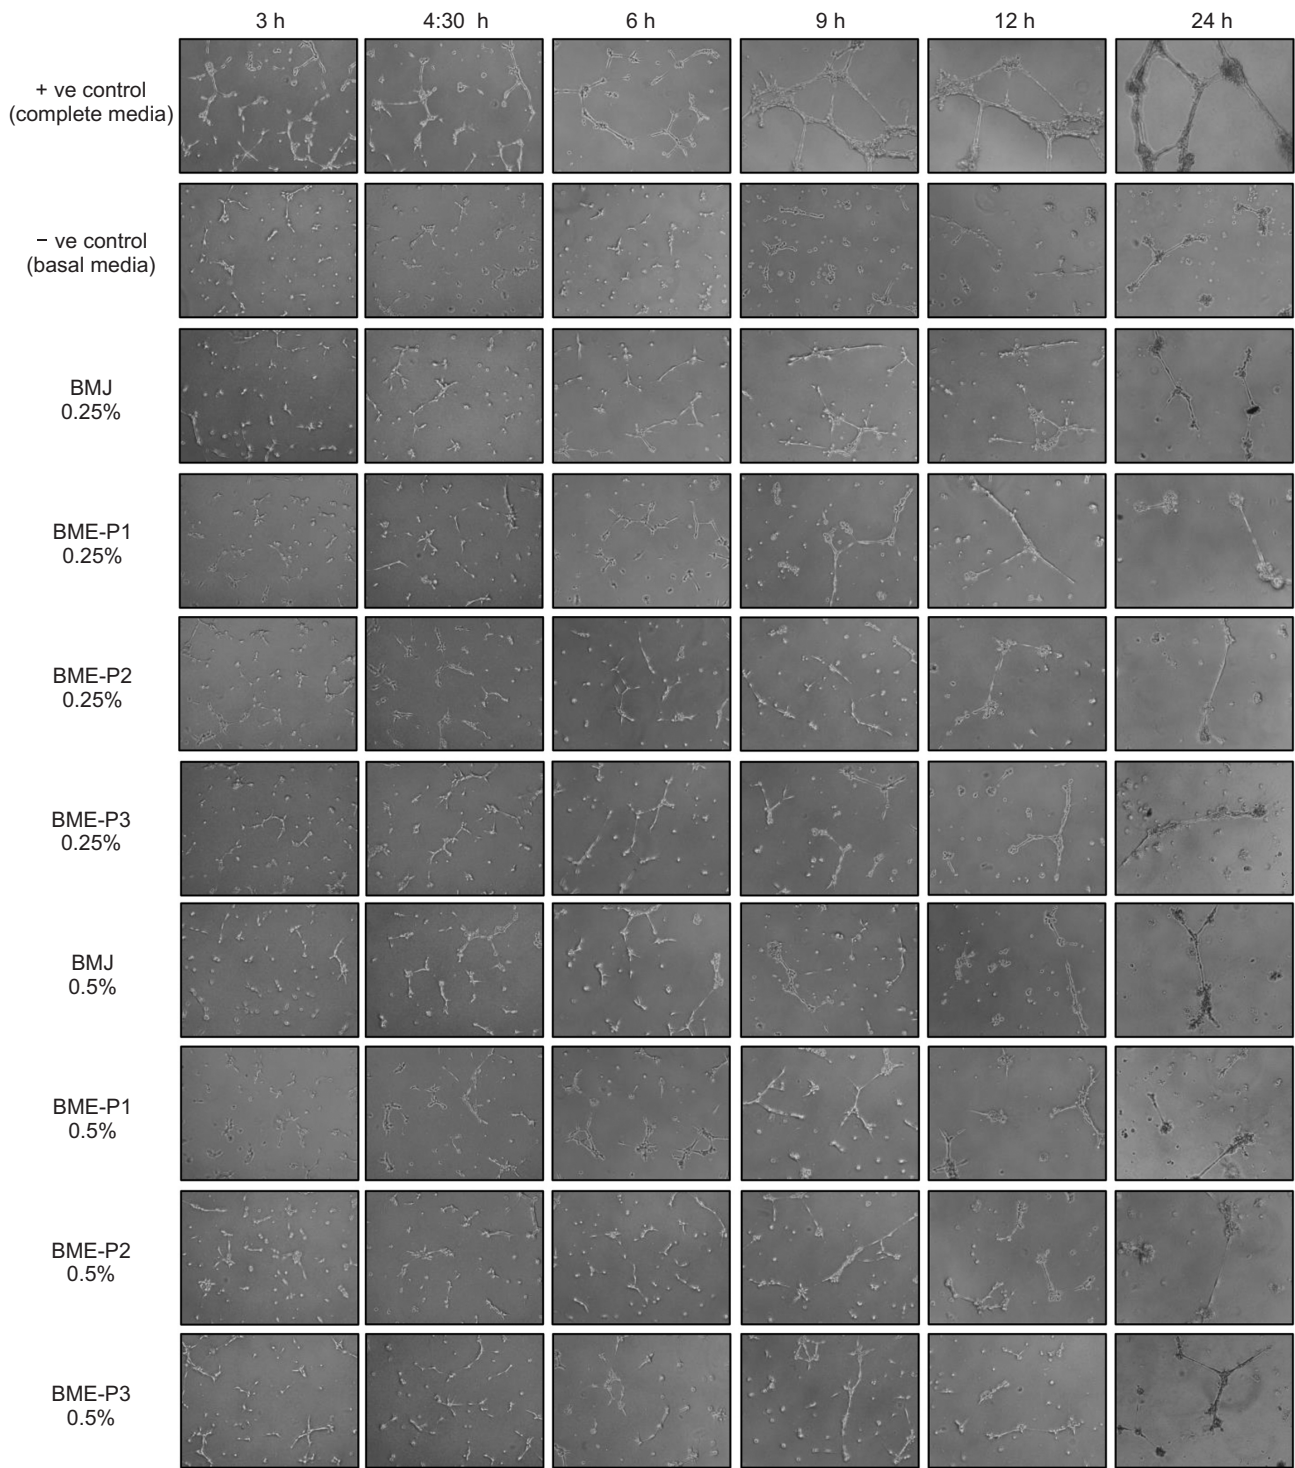

**Figure S1. Comparative time and dose-dependent effect of bitter melon variants on the growth of the capillary tube network formation in HUVEC.** Representative pictures of time and dose-dependent effect of different bitter melon variants (Chinese and Indian) on capillary tube network formation in HUVEC. In vitro angiogenesis assay was performed as described in materials and methods. EBM-2 media supplemented with the EGM-2 bullet kit was used as a positive control and EBM-2 basal medium was used as a negative control. The formation of endothelial tube formation was inhibited by treatment with BMJ (0.25% v/v) or BME-P1, P2, and P3 (0.25% and 0.5% v/v). HUVEC, human umbilical vein endothelial cells; CD-31, cluster of differentiation 31.
